# Supplementary material for: A Novel Cre/lox71-Based System for Inducible Expression of Recombinant Proteins and Genome Editing
Source: MDPI journal article supplement (doi:10.3390/cells11142141), 2022-07-07
Supplement: s1 [file s1]

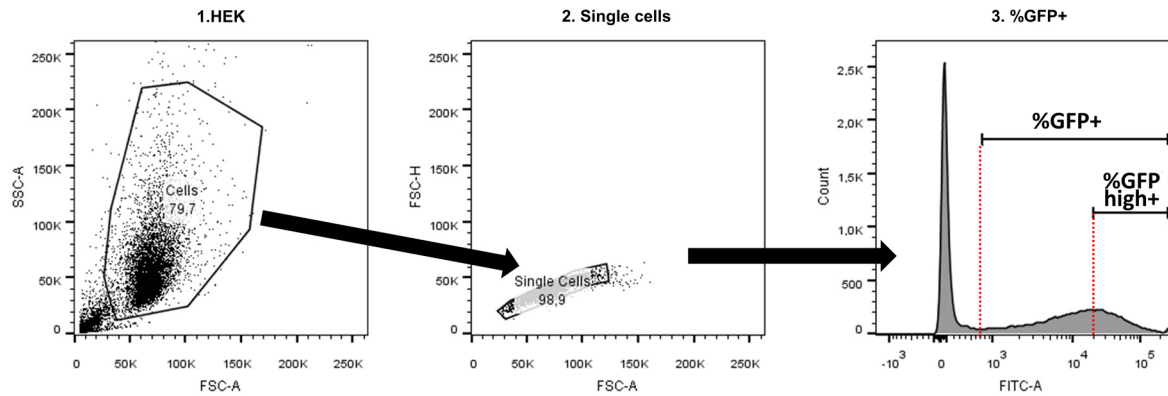

Supplementary Figure S1: Gating strategy used in the study: 1. HEK cells are gated based on size to exclude debris and large cell clumps. 2. Singlets are gated to exclude doublets. 3. Gating of GFP positive cells.

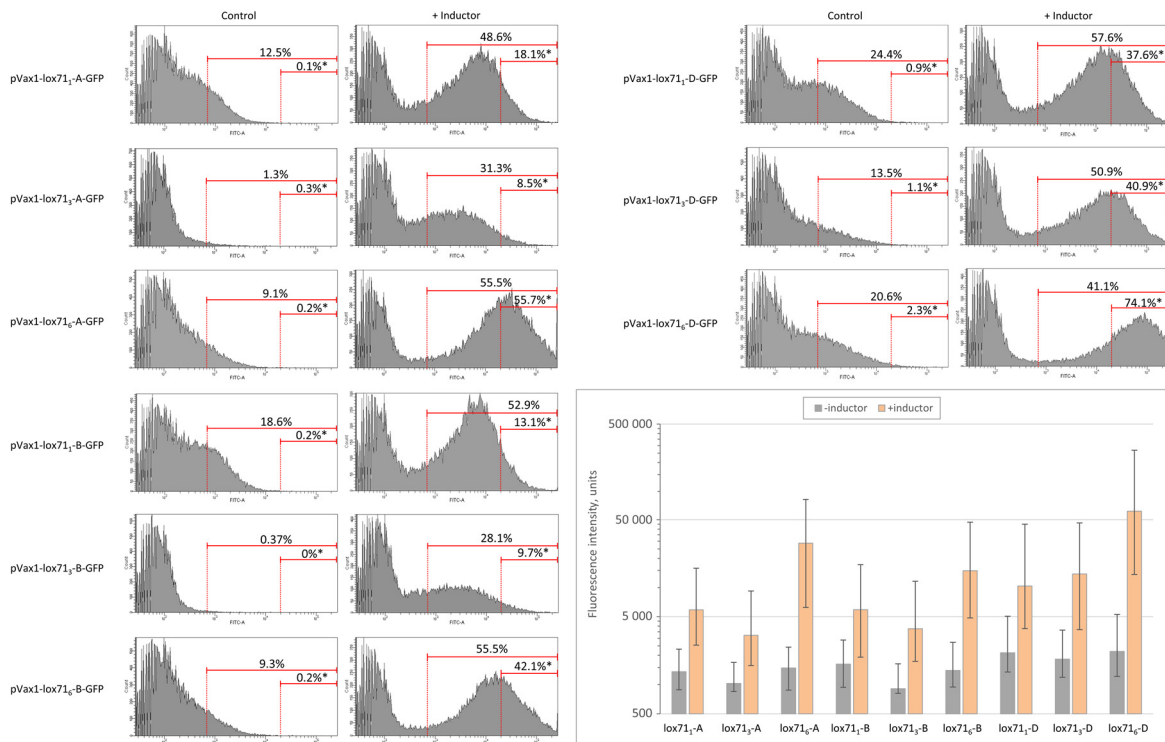

Supplementary Figure S2: The effect of the number of lox71 sites on the transgene expression for A/B/D minimal promoters (dCre<sub>Δ331</sub>-VP4 transactivator) - flow cytometry analysis of HEK293T cells transfected with the pVax1-lox71-C-GFP with 1, 3 or 6 lox71 sites or control plasmids 48 hours after the transfection. In the diagram data are presented as a median (25%;75%).

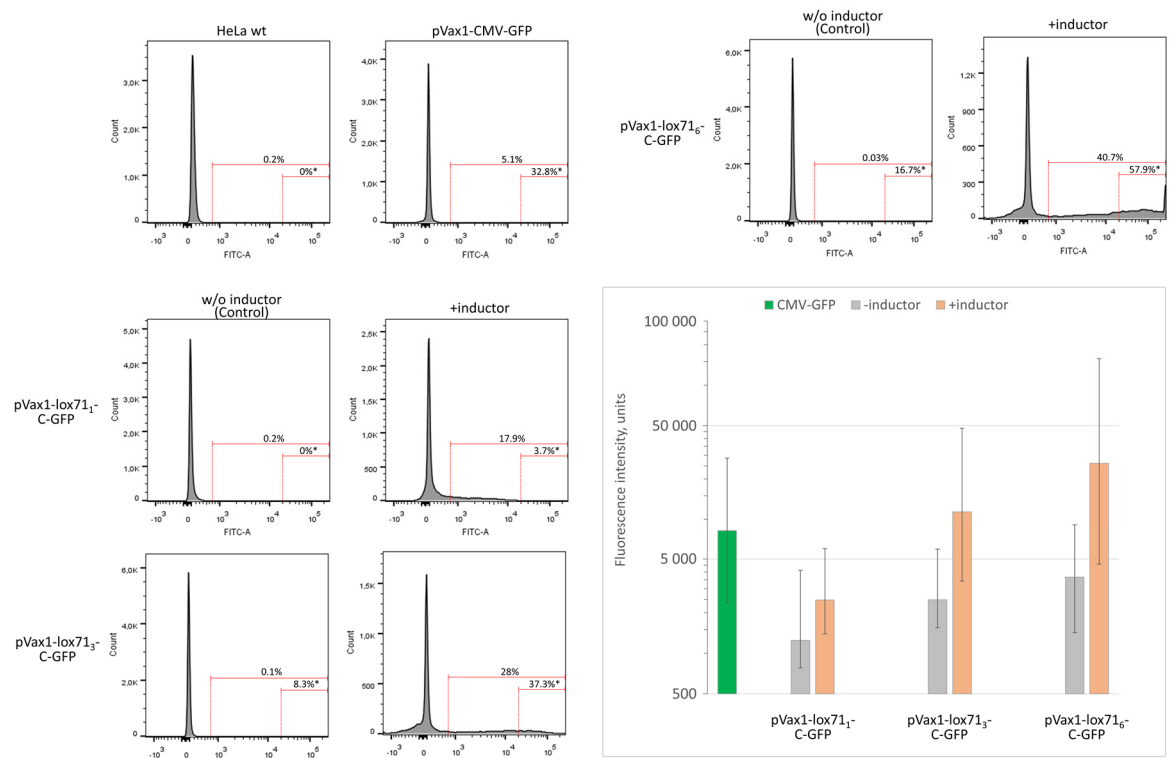

Supplementary Figure S3: The effect of the number of lox71 sites on the transgene expression for C minimal promoter (dCre $\Delta$ 331-VP4 transactivator) - flow cytometry analysis of HeLa cells transfected with the pVax1-lox71-C-GFP with 1, 3 or 6 lox71 sites or control plasmids 48 hours after the transfection. In the diagram data are presented as a median (25%;75%).
